# Supplementary material for: Highly resistant and sensitive colorimetric immunochromatographic assay for sibutramine (SBT) illegally adulterated into diet food based on PDA/AuNP labelling
Source: Royal Society of Chemistry journal article supplement (doi:10.1039/d2an02094g), 2023-01-01
Supplement: d2an02094g1.pdf [file d2an02094g1.pdf]

## Supporting Information

### Highly Resistant and Sensitive Colorimetric Immunoassay for Sibutramine Illegally Adulterated into Diet Food based on PDA/AuNPs Labelling

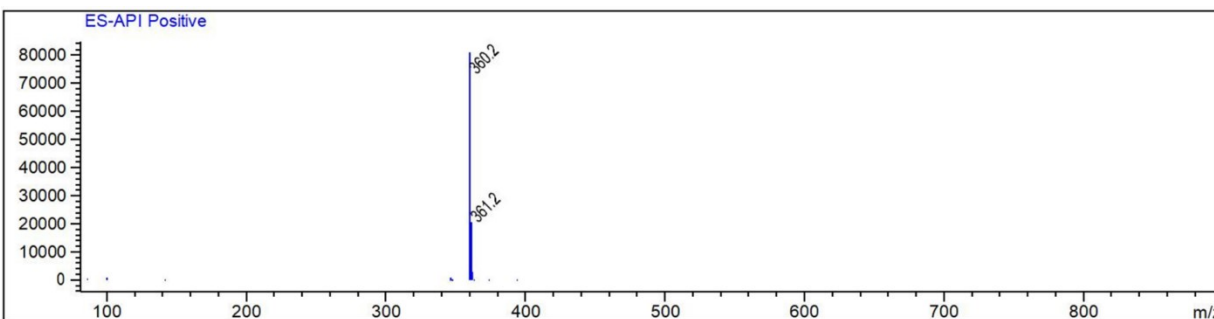

**Figure. S1.** Positive ion electrospray mass spectra of hapten.

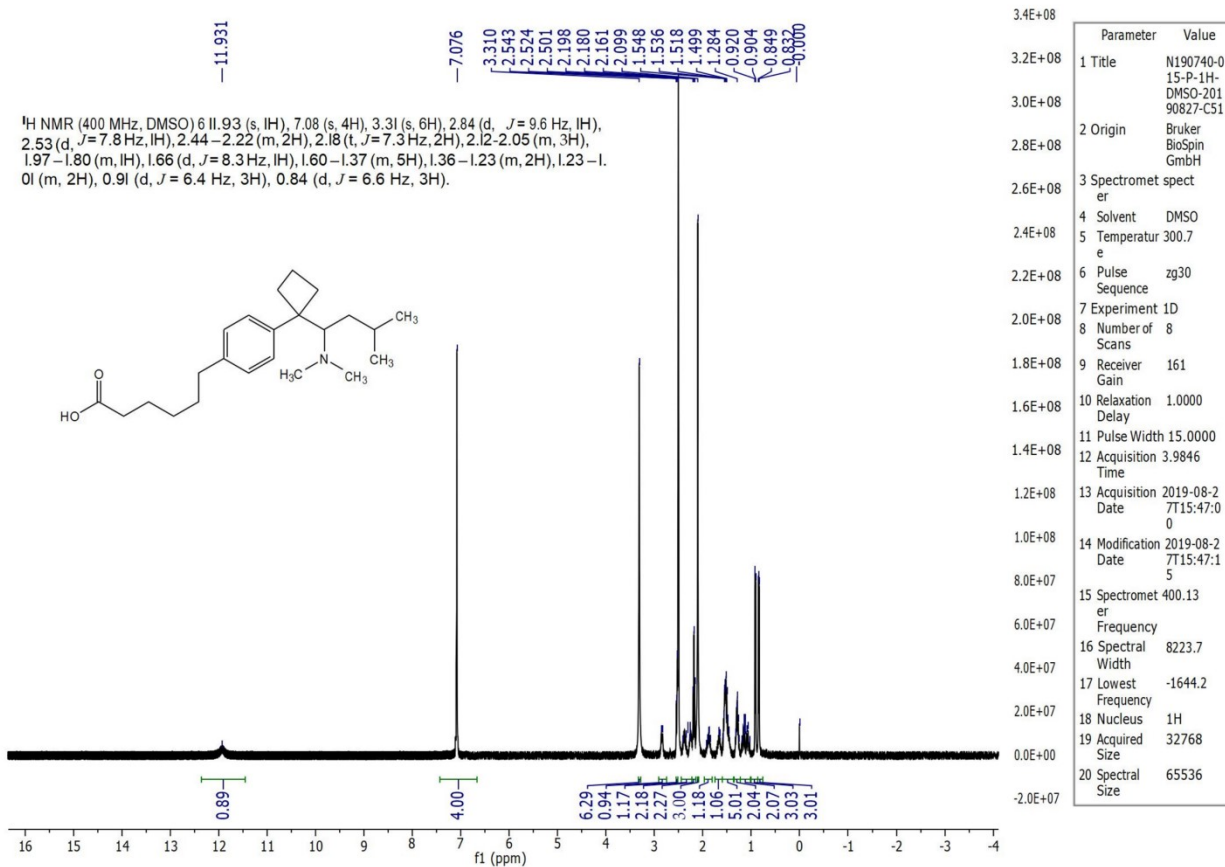

Figure. S2. <sup>1</sup>H-NMR spectra of hapten measured in DMSO at 400 MHz.

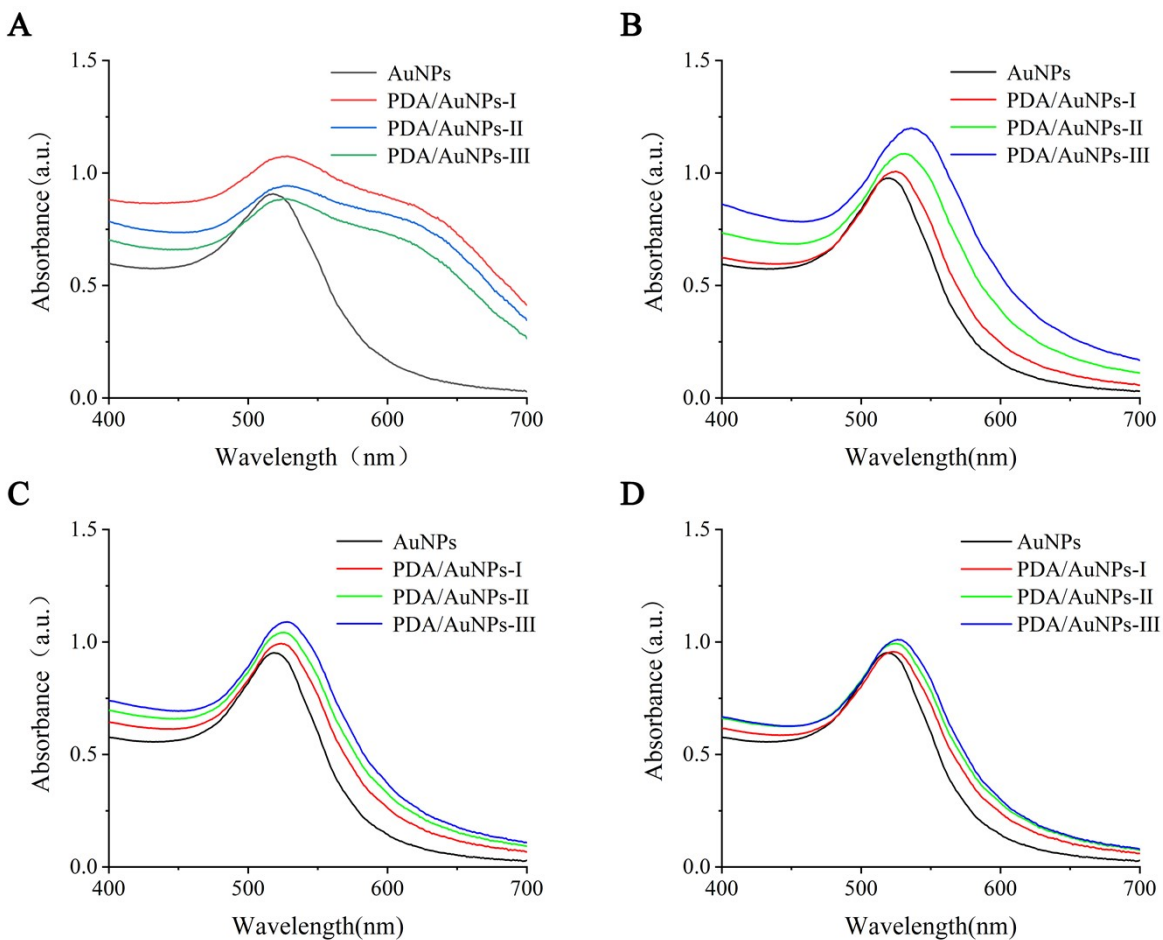

**Figure. S3.** UV–vis absorption spectra of PDA/AuNPs-I (5  $\mu\text{g}$  DA·HCl addition), PDA/AuNPs-II (10  $\mu\text{g}$  DA·HCl addition), and PDA/AuNPs-III (15  $\mu\text{g}$  DA·HCl addition) in alkaline solution (pH 8.5) with (A) 0, (B) 4, (C) 6, and (D) 8  $\mu\text{L}$  of 3%  $\text{H}_2\text{O}_2$ .

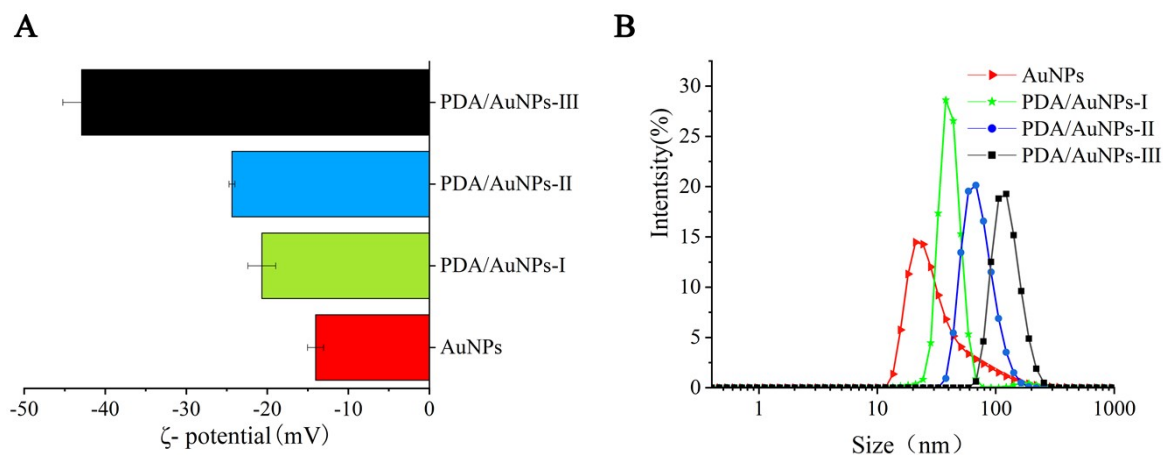

**Figure. S4.** (A)  $\zeta$ -Potential and (B) Size distribution of hydrodynamic diameter of AuNPs, PDA/AuNPs-I, PDA/AuNPs-II, and PDA/AuNPs-III.

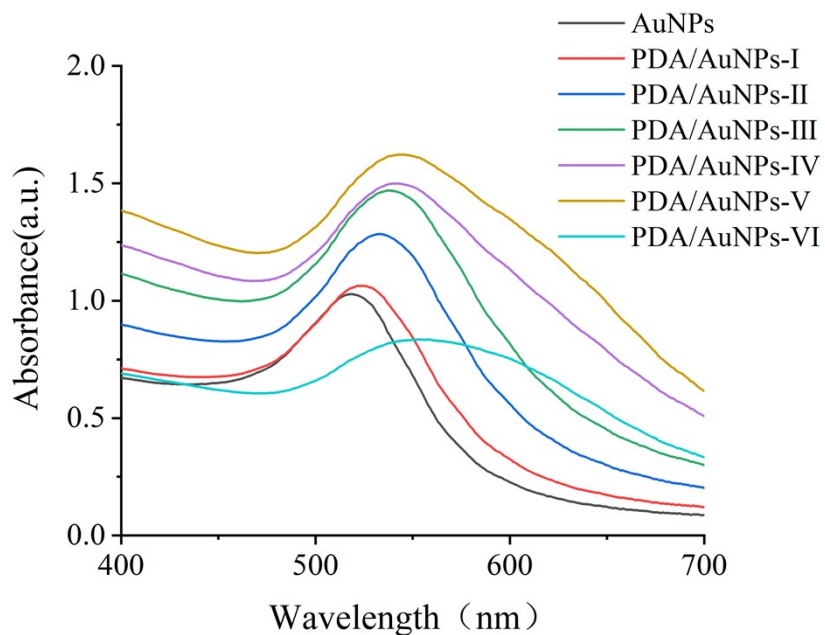

**Figure. S5** UV-vis absorption spectra of PDA/AuNPs with excessive addition of DA·HCl.

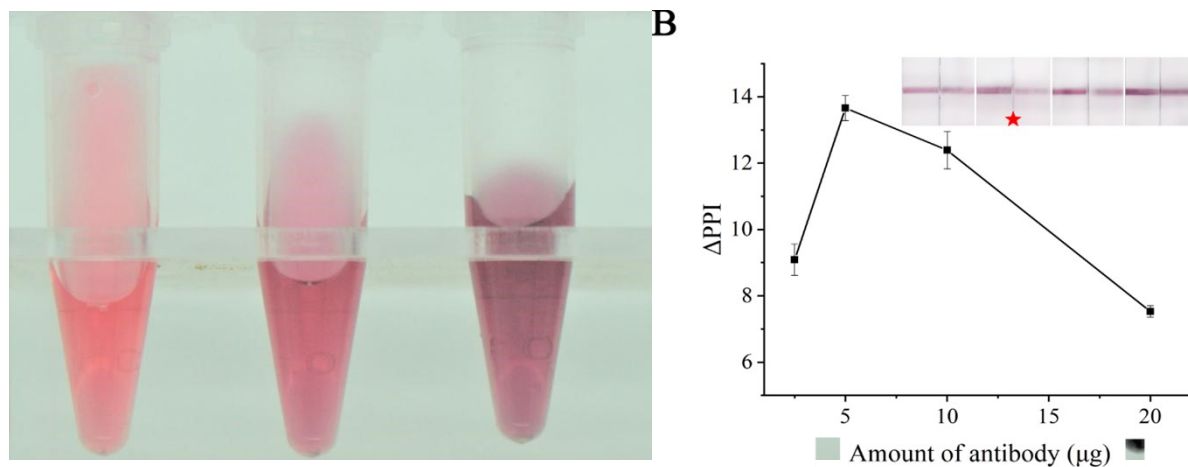

**Figure. S6.** Aggregation of particles with excessive addition of DA·HCl overnight.

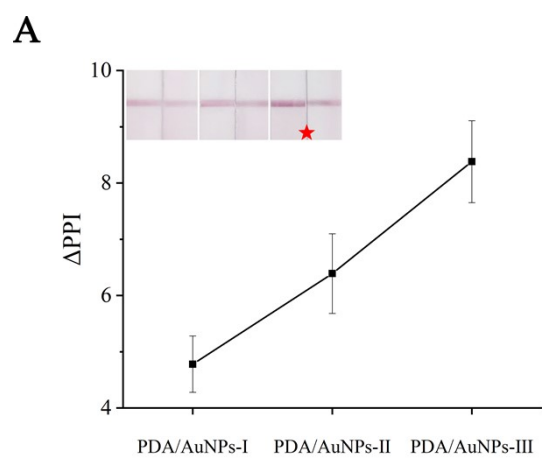

**Figure. S7.** Optimization results of (A) thickness of PDA/AuNPs and (B) amount of antibody for PDA/AuNPs-III conjugation. Red stars represent the optimal parameters.

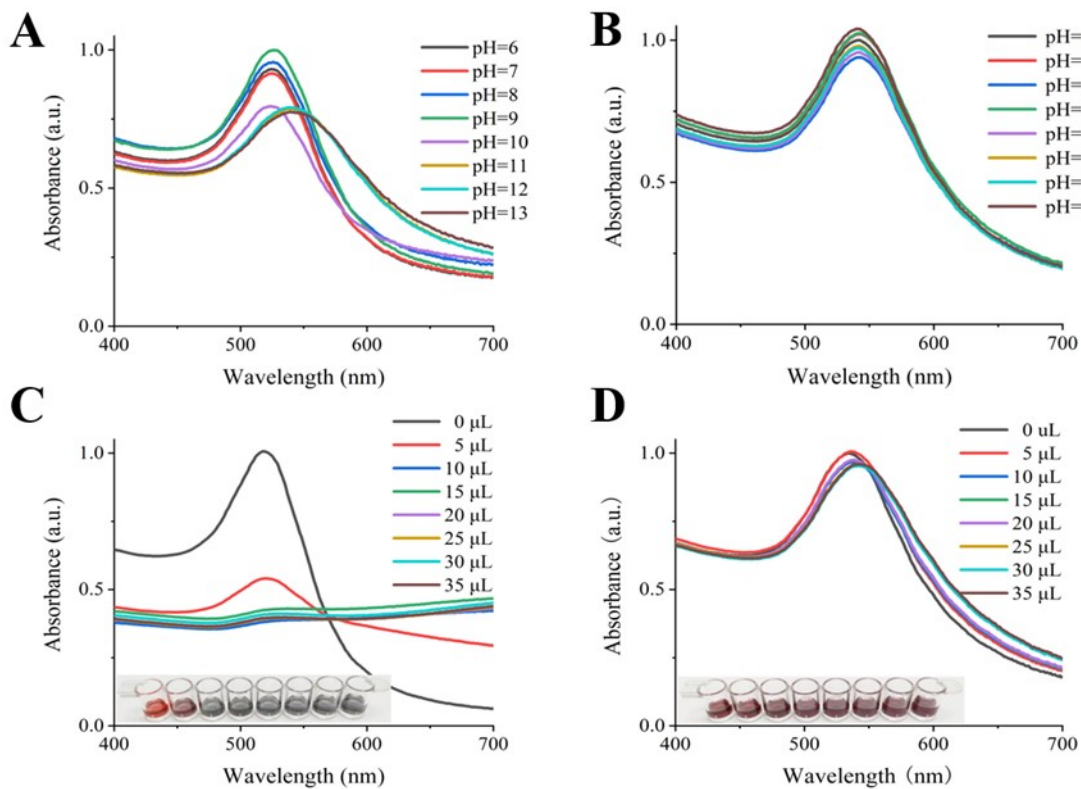

**Figure. S8.** Uv-vis absorption spectra and images of AuNPs-mAb and PDA/AuNPs-III-mAb at different pH values and salt stress (by adding different volumes of 10% NaCl [ $\mu\text{L}$ ]): (A) tolerance to pH of AuNPs-mAb and (B) PDA/AuNPs-mAb, and tolerance to (C) NaCl AuNPs-mAb and (D) PDA/AuNPs-mAb.

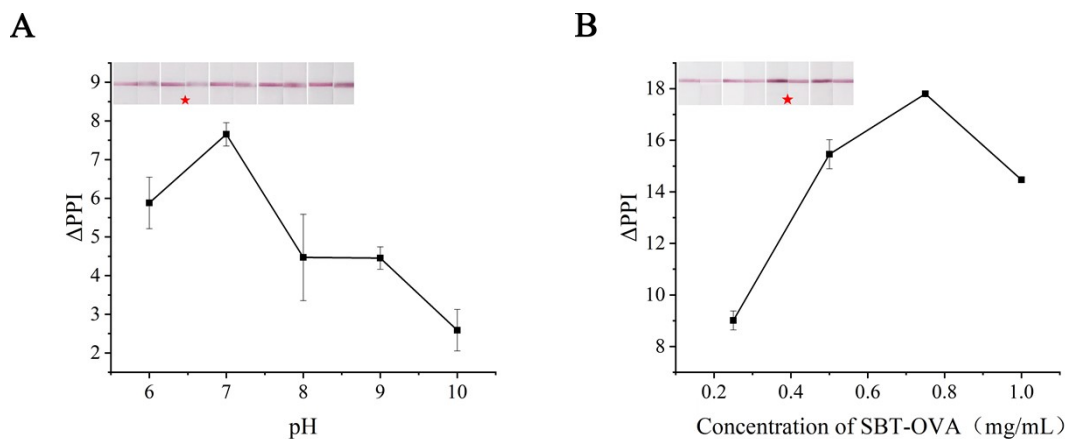

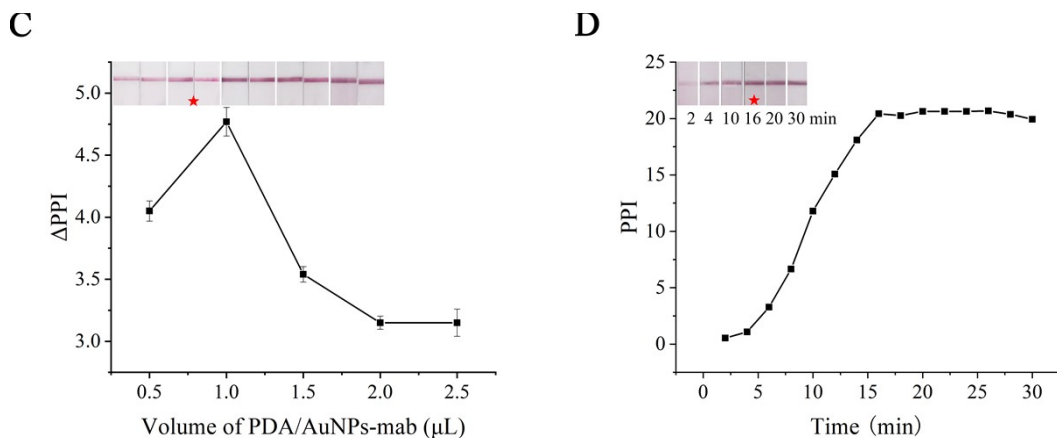

**Figure S9.** Optimization of (A) pH, (B) concentration of SBT–OVA, (C) volume of PDA/AuNPs-mAb, and (D) immunochromatographic time. Red stars represent the optimal parameters.

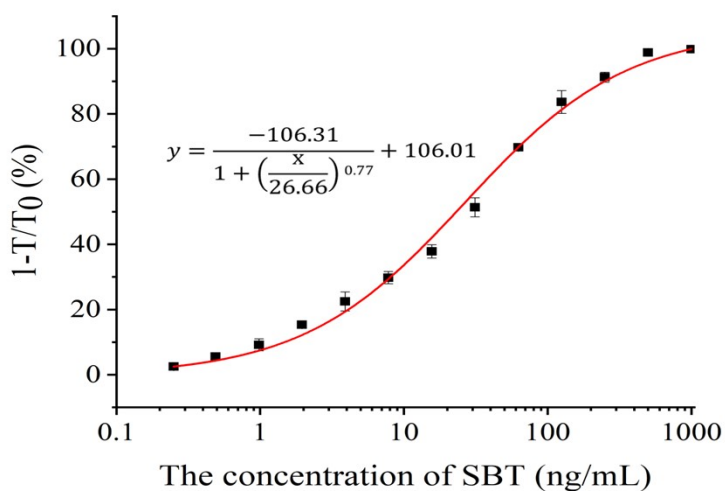

**Figure S10.** Standard curve of PDA/AuNPs-based LFIA for 0, 0.25, 0.49, 0.98, 1.95, 3.9, 7.81, 15.63, 31.25, 62.5, 125, 250, 500 ng/mL M<sub>1</sub> in buffer. T was the value with M<sub>1</sub> in PBS and T<sub>0</sub> represented the value without any drug.

0 0.25 0.49 0.98 1.95 3.91 7.8 15.63 31.25 62.5 125 250 500 ng/mL

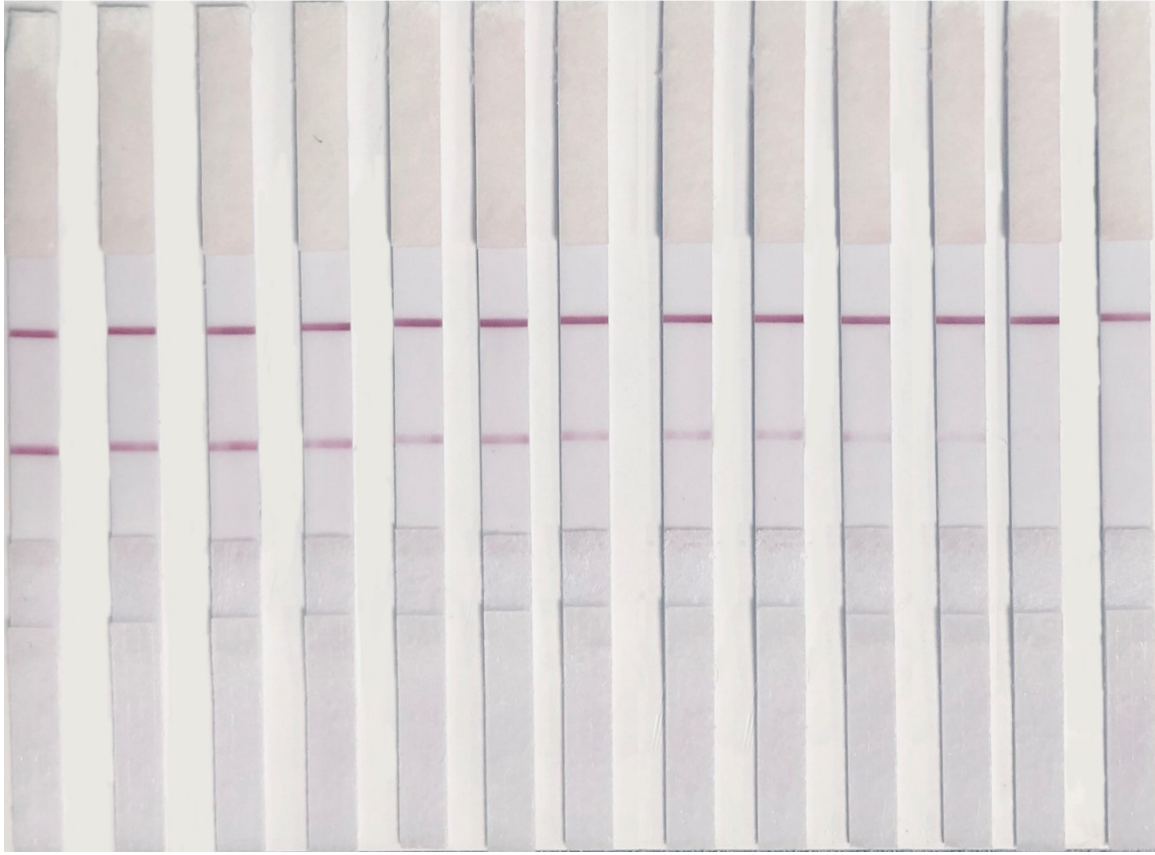

**Figure S11.** photographs of PDA/AuNPs-based LFIA for 0, 0.25, 0.49, 0.98, 1.95, 3.9, 7.81, 15.63, 31.25, 62.5, 125, 250, 500 ng/mL  $M_1$  in buffer.



**Table S1.** Cross-reaction Study of mAb Against SBT and its Analogues (ELISA).

| Analogues      | Structure                                                                           | IC <sub>50</sub><br>(ng/mL) | CR (%) |
|----------------|-------------------------------------------------------------------------------------|-----------------------------|--------|
| SBT            | 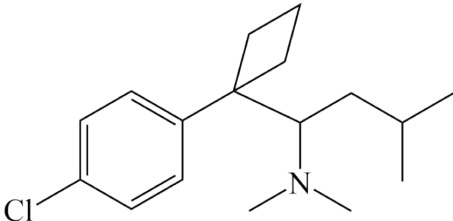  | 0.69                        | 100    |
| M <sub>1</sub> |   | 1.23                        | 56.10  |
| M <sub>2</sub> |  | >5000                       | <0.01  |

**Table S2.** Comparison of different methods for the determination of SBT

| Method                       | Limit of quantitation | Linear range         | Consumption of time | Reference |
|------------------------------|-----------------------|----------------------|---------------------|-----------|
| Electrochemical immunosensor | 5 ng/mL               | 0.015 µg/mL~10 µg/mL | 8 min               | 1         |

|                                                                 |                         |                                                 |          |           |
|-----------------------------------------------------------------|-------------------------|-------------------------------------------------|----------|-----------|
| SERS sensor                                                     | 0.28 ng/mL              | Not mentioned                                   | > 60 min | 2         |
| Capillary Electrophoresis                                       | 30 ng/mL                | 0.1 µg/mL~50 µg/mL                              | > 60 min | 3         |
| High-Performance Liquid Chromatography                          | 5×10 <sup>2</sup> ng/mL | 5×10 <sup>2</sup> ng/mL~2×10 <sup>4</sup> ng/mL | > 60 min | 4         |
| Liquid Chromatography-Electrospray Ionisation-Mass Spectrometry | 4 ng/mL                 | 5 ng/mL~30 ng/mL                                | > 60 min | 5         |
| Au-ICA                                                          | 11.58 ng/mL             | 23.07 ng/mL~194.84 ng/mL                        | 16 min   | This work |
| PDA/AuNPs-ICA                                                   | 0.98 ng/mL              | 3.39 ng/mL~69.60 ng/mL                          | 16 min   | This work |

**Table S3.** Determination of SBT in samples (*n*=3)

| Sample            | Spiked (ng mL <sup>-1</sup> ) | LFIA detected (ng mL <sup>-1</sup> ) | Recovery (%) | RSD (%) | LC-MS/MS detected (ng mL <sup>-1</sup> ) | Recovery (%) | RSD (%) |
|-------------------|-------------------------------|--------------------------------------|--------------|---------|------------------------------------------|--------------|---------|
| Dietary           | 5                             | 4.87                                 | 97.41        | 2.74    | 5.27                                     | 105.40       | 4.65    |
| Fiber in Capsules | 10                            | 9.86                                 | 98.63        | 4.92    | 10.46                                    | 104.60       | 6.12    |
|                   | 20                            | 19.61                                | 98.05        | 4.38    | 21.33                                    | 106.65       | 5.78    |

**Table S4.** Determination of M1 in samples (*n*=3)

| Sample      | Spiked (ng mL <sup>-1</sup> ) | LFIA detected (ng mL <sup>-1</sup> ) | Recovery (%) | RSD (%) | LC-MS/MS detected (ng mL <sup>-1</sup> ) | Recovery (%) | RSD (%) |
|-------------|-------------------------------|--------------------------------------|--------------|---------|------------------------------------------|--------------|---------|
| Human Serum | 5                             | 5.43                                 | 108.60       | 3.85    | 4.76                                     | 95.20        | 5.04    |
|             | 10                            | 10.67                                | 106.70       | 4.17    | 9.81                                     | 98.10        | 4.83    |
|             | 20                            | 19.45                                | 97.25        | 6.01    | 19.97                                    | 99.85        | 6.27    |

## References

- (1) Saichanapan, J.; Promsuwan, K.; Limbut, W. Adsorption and determination of sibutramine in illegal slimming product using porous graphene ink-modified electrode. *Talanta* **2020**, *212*, 120788.
- (2) Ouyang, L.; Jiang, Z.; Wang, N.; Zhu, L.; Tang, H. Rapid Surface Enhanced Raman Scattering (SERS) Detection of Sibutramine Hydrochloride in Pharmaceutical Capsules with a beta-Cyclodextrin- Ag/Polyvinyl Alcohol Hydrogel Substrate. *Sensors (Basel)* **2017**, *17*.
- (3) Wang, D.; Man, R.; Shu, M.; Liu, H.; Gao, Y.; Luan, F. Detection of sibutramine and phenolphthalein in functional foods using capillary electrophoresis. *Analytical Methods* **2016**, *8*, 621-626.
- (4) Ariburnu, E.; Uludag, M. F.; Yalcinkaya, H.; Yesilada, E. Comparative determination of sibutramine as an adulterant in natural slimming products by HPLC and HPTLC densitometry. *J Pharm Biomed Anal* **2012**, *64-65*, 77-81.
- (5) Yano, H. M.; Arias, F. F.; Bianco, M.; Trujillo, L. M. Determination of the sibutramine content of dietary supplements using LC-ESI-MS/MS. *LATIN AMERICAN JOURNAL OF PHARMACY* **2013**, *2013*, 1164-1169.
